# Supplementary material for: Conserved cardiolipin-mitochondrial ADP/ATP carrier interactions assume distinct structural and functional roles that are clinically relevant
Source: PubMed Central journal article supplement — bioRxiv. 2023 May 6:2023.05.05.539595. Preprint. [Version 1] doi: 10.1101/2023.05.05.539595 (PMC10187269; doi:10.1101/2023.05.05.539595), 2023-05-06
Supplement: media-1.pdf [file media-1.pdf]

fig. S1

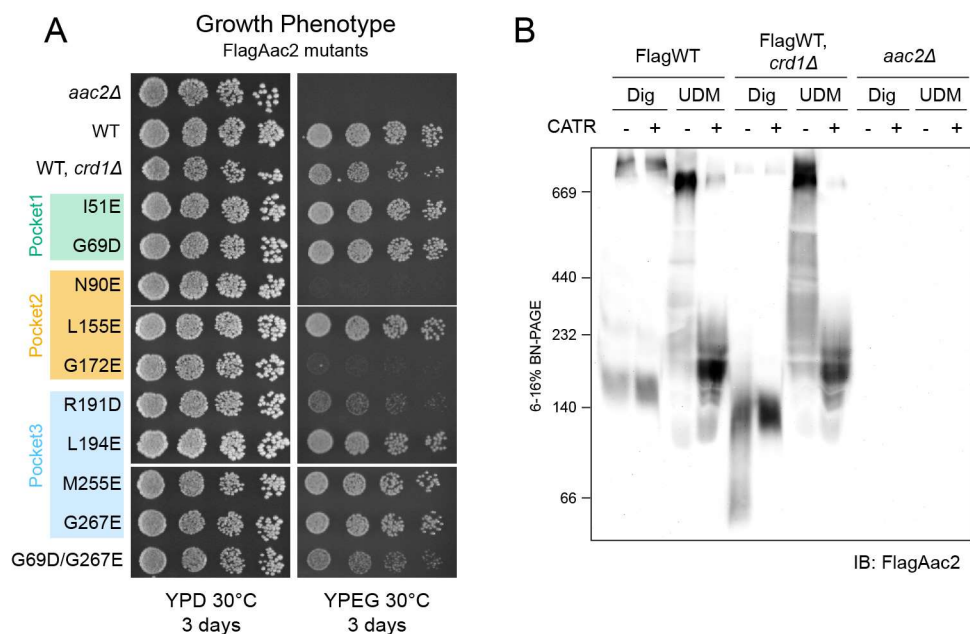

**fig. S1: Characterization of Flag-tagged WT and mutant Aac2.** (A) Growth phenotype of Flag-tagged Aac2 CL-binding mutants. Serial dilutions of indicated cells were spotted onto fermentable (YPD) and respiratory (YPEG) media and incubated at 30°C for 3 days (n=3). (B) Mitochondria from indicated strains were mock- or pre-treated with 40 μM CATR. The treated mitochondria were then solubilized with 1.5% (w/v) digitonin or 2% (w/v) UDM, resolved by 6 to 16% blue native-PAGE and immunoblotted for Flag. Representative image from the replicates (n=3) is shown.

fig. S2

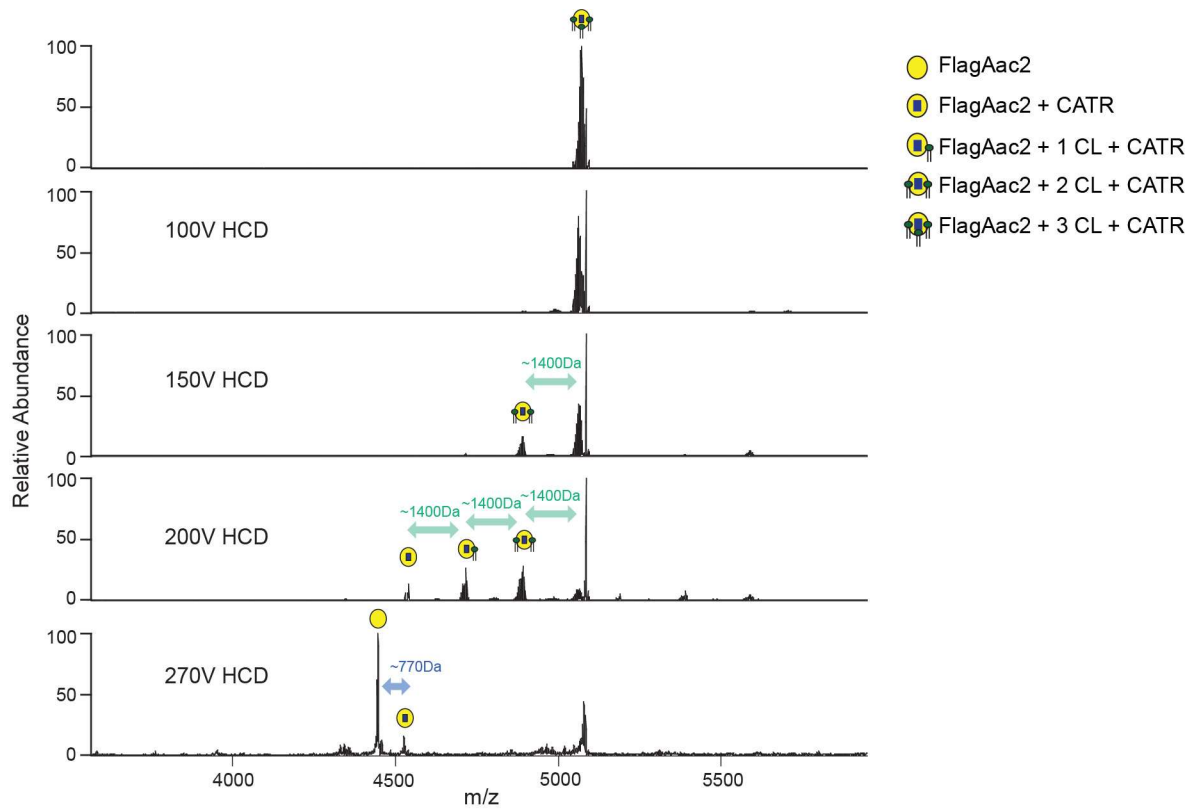

**fig. S2: Three CL molecules associated with Aac2.** Related to Fig. 2, MSMS performed against Aac2 + 3CL + CATR complex ( $m/z$  5069 Da). Increased high collision dissociation (HCD) yielded spectra corresponding to CL (~1400 Da) and CATR (~770 Da).

fig. S3

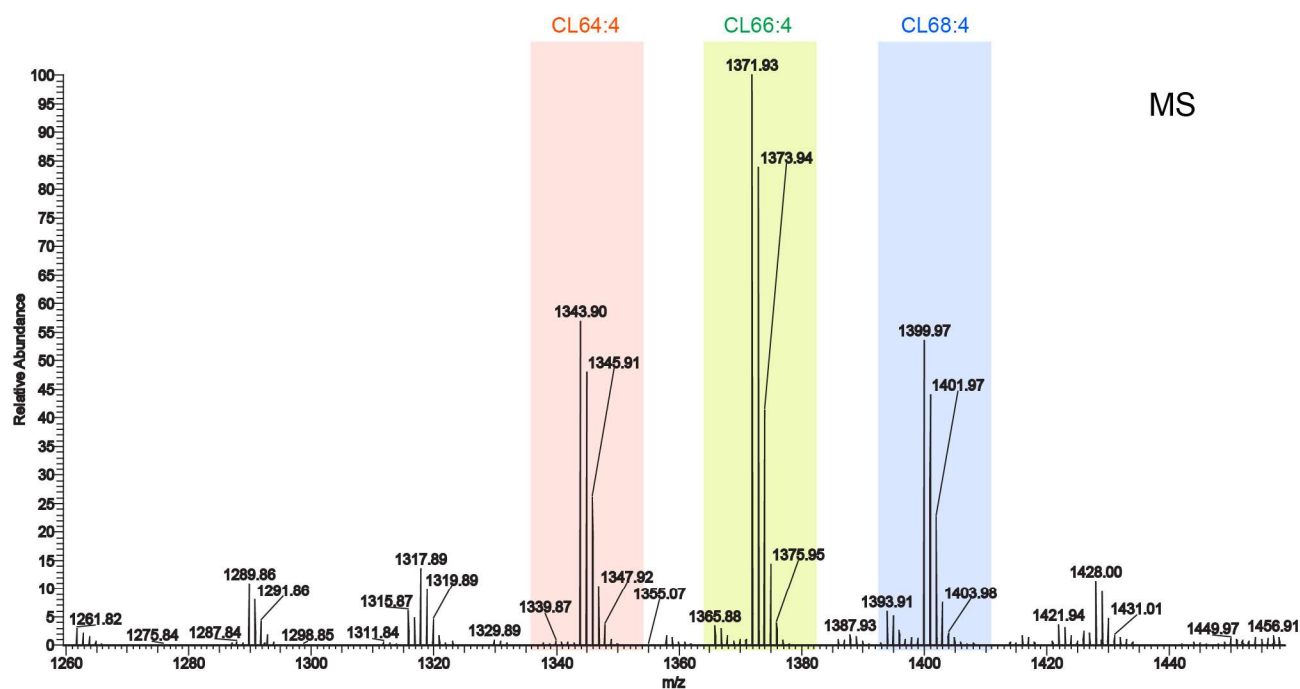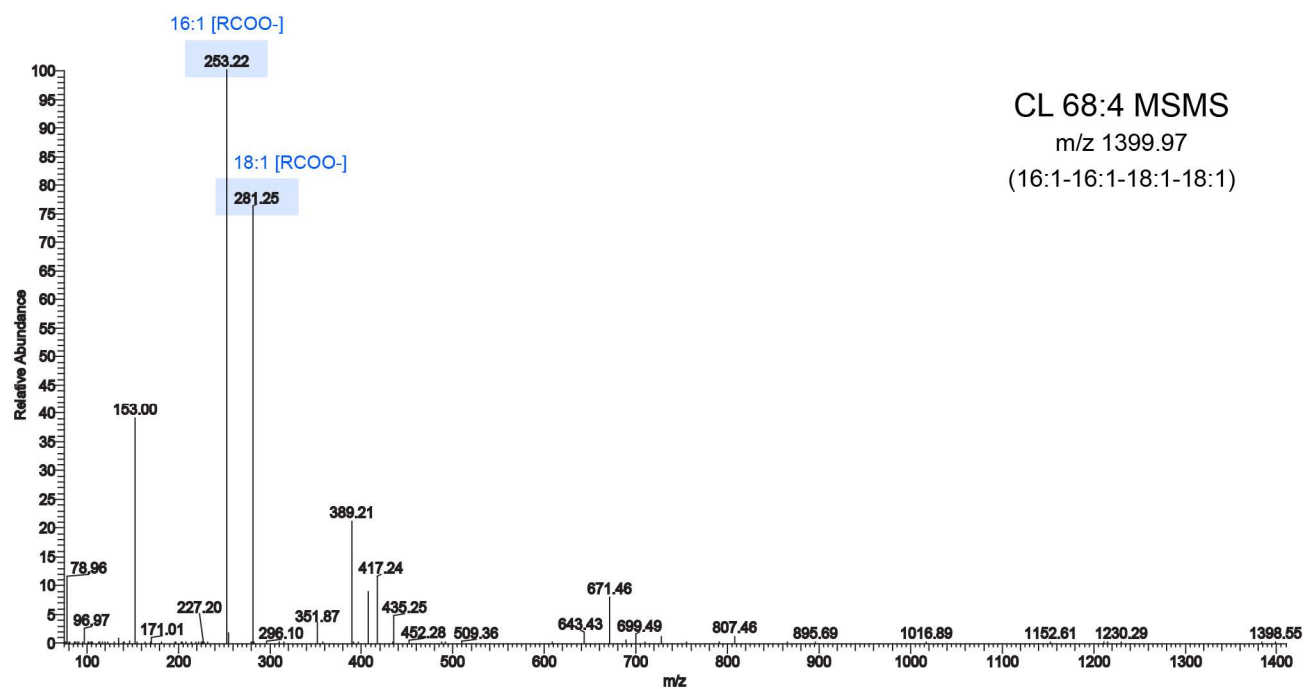

**fig. S3: CL species interacting with yeast Aac2.** Mass spectrometry (MS) analysis detected three types of CL species that co-purified with FlagAac2 from WT mitochondria (Top). MSMS performed against CL 68:4 yielded unique fragments corresponding to acyl-chains derived from CL (Bottom).

fig. S4

A

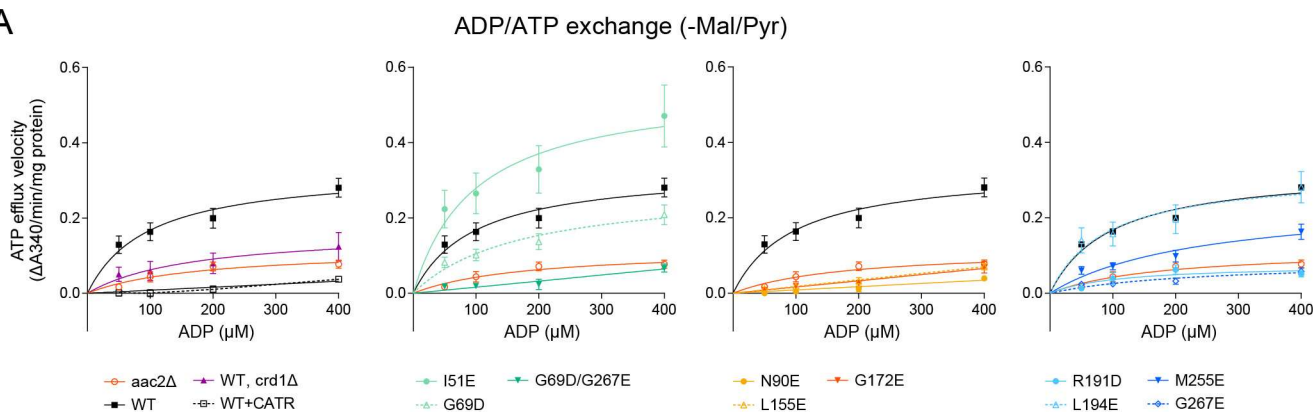

B

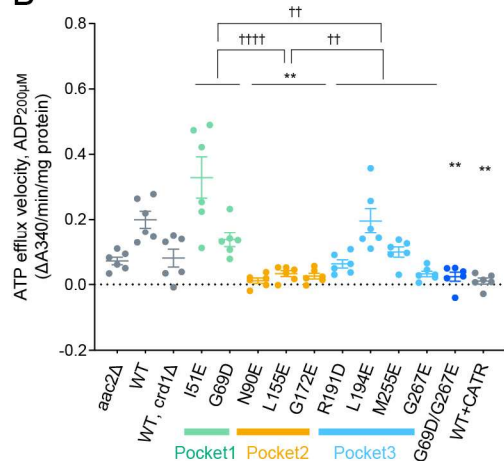

C

|                  | -Mal/Pyr                                                        |                                 |
|------------------|-----------------------------------------------------------------|---------------------------------|
|                  | Vmax [95% CI]<br>( $\mu\text{M}/\text{min}/\text{mg protein}$ ) | Km [95%CI]<br>( $\mu\text{M}$ ) |
| <i>aac2Δ</i>     | 0.1189 [0.07293–0.3012]                                         | 180.0 [50.25–894.0]             |
| WT               | 0.3298 [0.2442–0.4902]                                          | 96.61 [34.10–252.2]             |
| WT, <i>crd1Δ</i> | 0.1682 [n.d.]                                                   | 170.4 [n.d.]                    |
| I51E             | 0.5506 [0.3491–1.163]                                           | 97.38 [14.52–485.5]             |
| G69D             | 0.2848 [0.1881–0.5864]                                          | 171.1 [54.89–640.9]             |
| N90E             | n.d. [n.d.]                                                     | n.d. [n.d.]                     |
| L155E            | 2.548 [n.d.]                                                    | 14171 [n.d.]                    |
| G172E            | n.d. [n.d.]                                                     | n.d. [n.d.]                     |
| R191D            | 0.07614 [0.04341–0.1947]                                        | 111.0 [14.06–707.4]             |
| L194E            | 0.3212 [0.2071–0.6405]                                          | 89.75 [12.82–421.9]             |
| M255E            | 0.2499 [0.1548–0.7122]                                          | 240.0 [75.71–1231]              |
| G267E            | 0.08628 [n.d.]                                                  | 234.7 [n.d.]                    |
| G69D/G267E       | n.d. [n.d.]                                                     | n.d. [n.d.]                     |
| WT +CATR         | n.d. [n.d.]                                                     | n.d. [n.d.]                     |

**fig. S4: ADP/ATP exchange of Aac2 CL-binding mutants without respiratory substrates.** The efflux of matrix ATP was detected with isolated mitochondria as in Fig. 4A-C. The measurement was performed in the absence of malate and pyruvate (-Mal/Pyr). WT + CATR: WT mitochondria were treated with 5  $\mu\text{M}$  CATR prior to the efflux reaction ( $n=6$ ). (A) The linear part of the initial velocity for the ATP efflux was plotted and curve fitting performed by nonlinear regression (mean with SEM). Plots of *aac2Δ* and WT are repeated in all panels. (B) The initial linear velocity following the addition of 200  $\mu\text{M}$  ADP shown as scatter plots (mean with SEM). (C) Fitted Km and Vmax values were obtained using the Michaelis-Menten equation (mean).

fig. S5

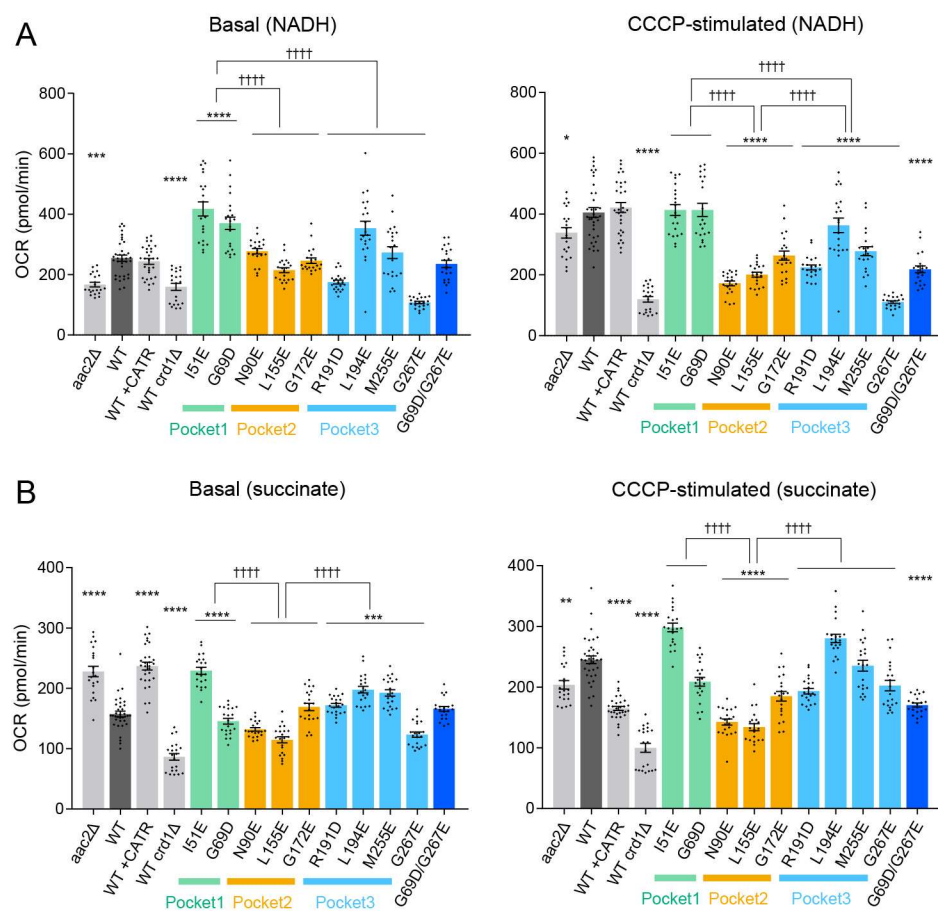

**fig. S5: Mitochondrial respiration of Aac2 CL-binding mutants.** Related to Fig. 4D-F, basal and CCCP-stimulated respirations of WT and mutant mitochondria in the presence of NADH (A) and succinate (B) were plotted as oxygen consumption rate (OCR). Mean with SEM, n=21-35. Significant differences obtained by two-way ANOVA followed by Tukey's multiple comparisons test are shown as \* for comparison with WT and † for comparison between pockets; \*p<0.05, \*\*p<0.01, \*\*\*p<0.001, \*\*\*\*p<0.0001.

fig. S6

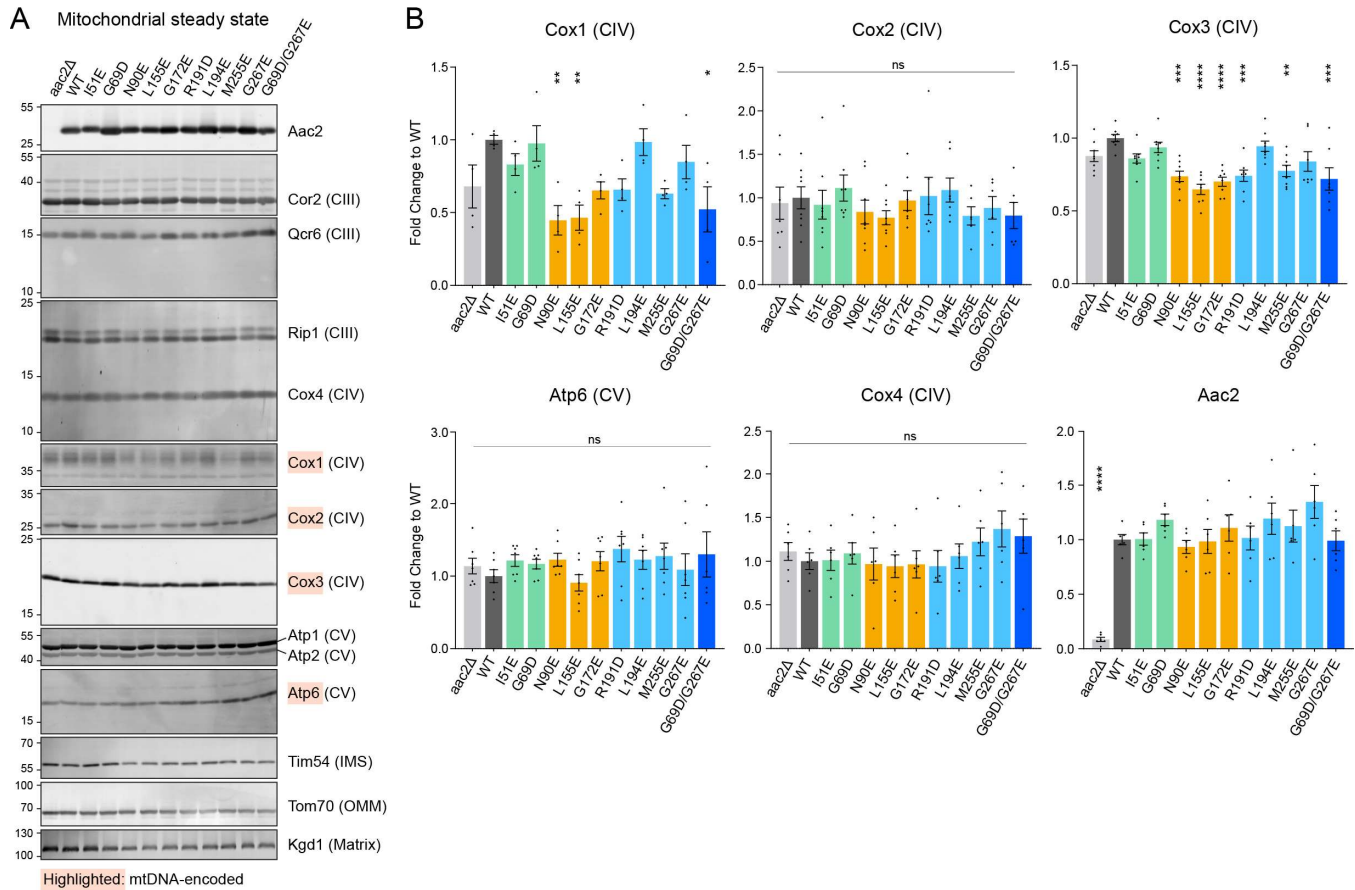

**fig. S6: The expression of respiratory complex subunits encoded in mitochondrial DNA is attenuated in Aac2 CL-binding mutants.** (A) Mitochondrial extracts were resolved by SDS-PAGE and immunoblotted for indicated proteins, including subunits of respiratory complexes III, IV, and V. (B) The expression of indicated respiratory complex subunits was quantified. Mean with SEM. Statistical differences were analyzed by one-way ANOVA followed by Dunnett's multiple comparison test; \* $p < 0.05$ , \*\* $p < 0.01$ , \*\*\* $p < 0.001$ , \*\*\*\* $p < 0.0001$  (vs. WT). Representative images from the replicates ( $n = 4-8$ ) are shown.

fig. S7

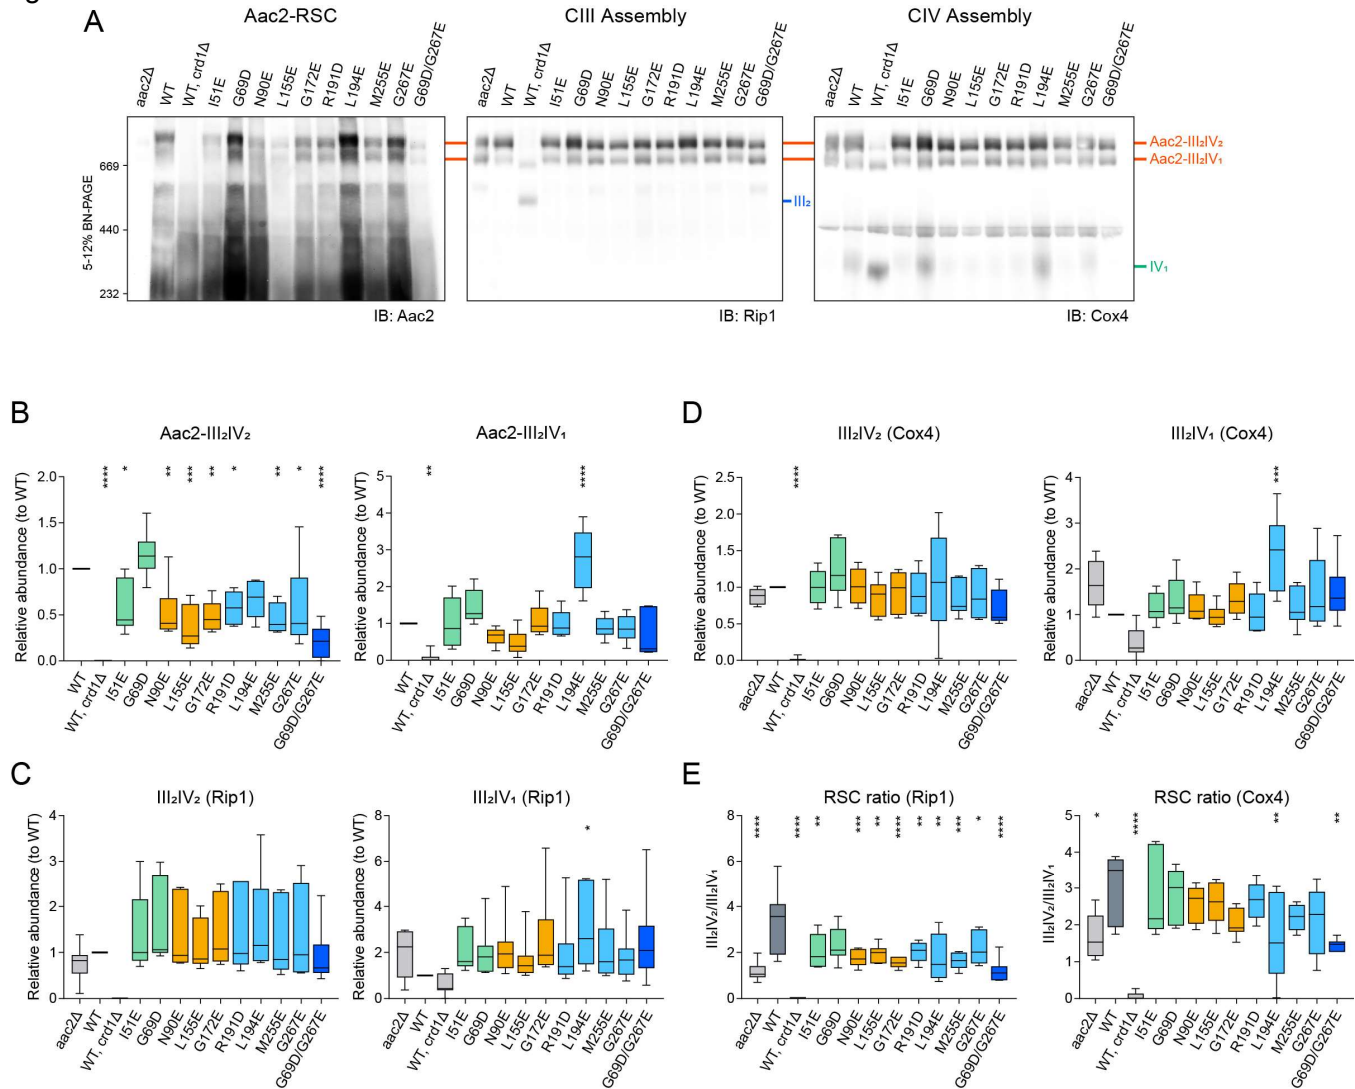

fig. S8

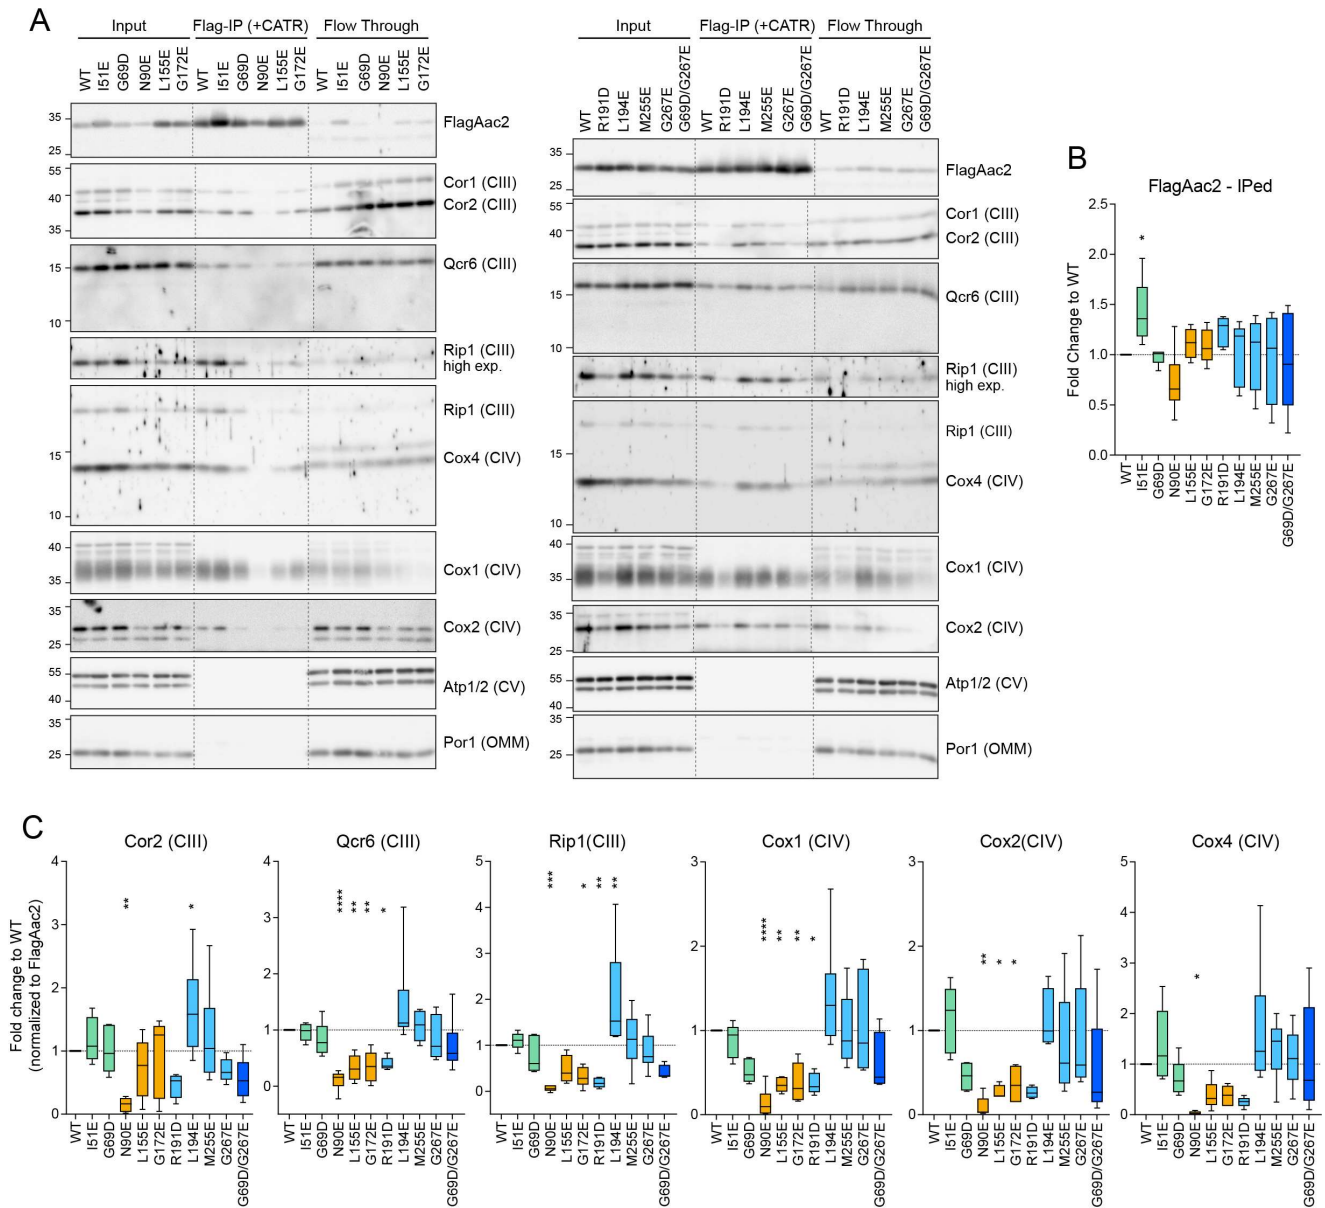

**fig. S8: Protein-protein interaction between Aac2 and respiratory complex subunits are diminished in Aac2 CL-binding mutants.** (A) Isolated mitochondria from Flag-tagged WT and mutant Aac2 strains were pre-incubated with 40  $\mu$ M CATR and then solubilized with 1.5% (w/v) digitonin. The mitochondrial extracts were immunoprecipitated (IP) using anti-Flag resin. Co-purified subunits of complexes III and IV were determined by immunoblotting; Atp1/2 and Por1 served as controls. Four percent of input (intact mitochondria) and flow through (unbound) was analyzed. (B) The abundance of FlagAac2 eluted upon IP. (C) The abundance of subunits of complexes III and IV co-purified with FlagAac2 was quantified and normalized. Data are shown as box-whisker plots with the box extended from 25th to 75th percentiles and the whiskers indicating the min to max range. Statistical differences were analyzed by one-way ANOVA followed by Dunnett's multiple comparison test; \* $p < 0.05$ , \*\* $p < 0.01$ , \*\*\* $p < 0.001$ , \*\*\*\* $p < 0.0001$  (vs. WT). Representative images from the replicates ( $n = 4-12$ ) are shown.



fig. S9

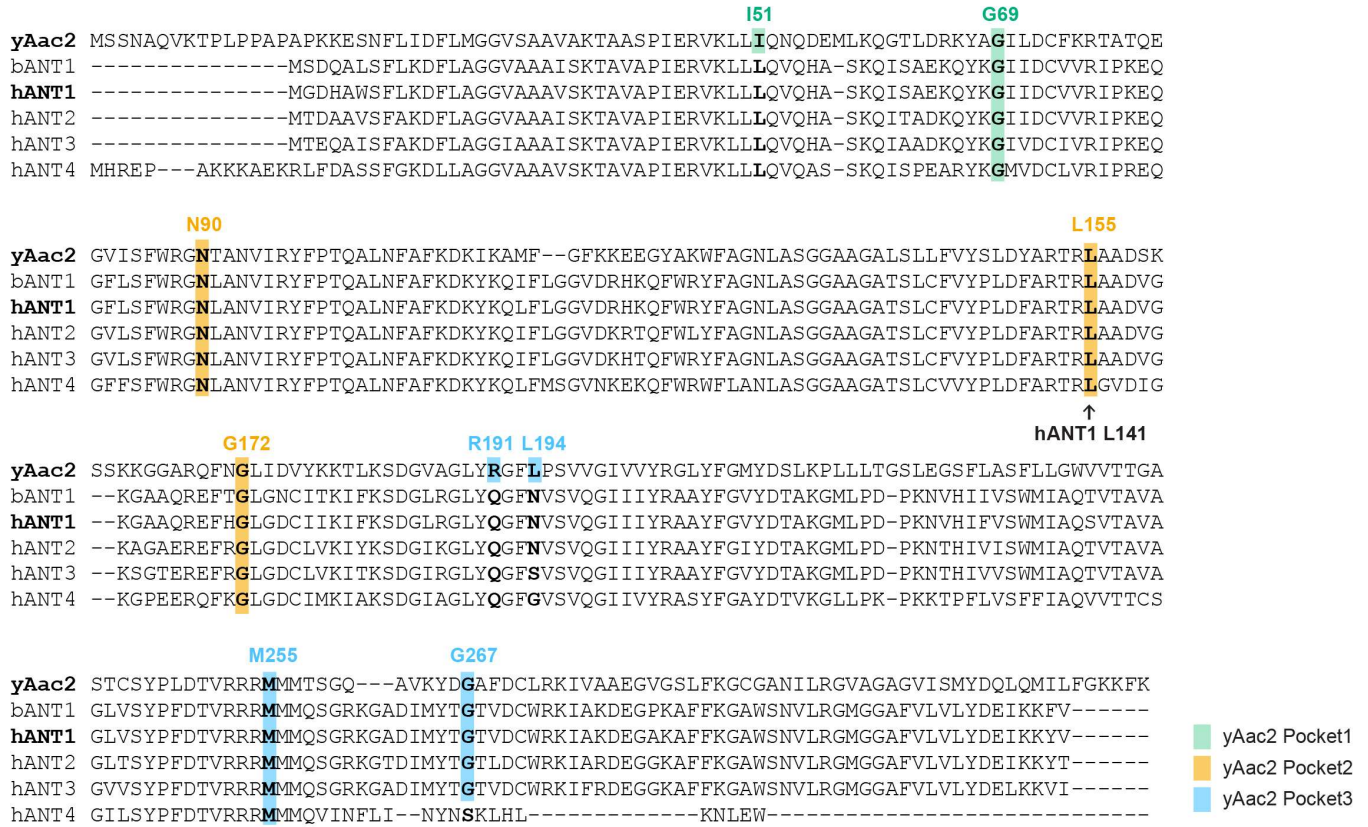

**fig. S9: CL-binding sites are conserved across species.** Amino acid sequence alignment of yeast Aac2, bovine ANT1, and human ANT isoforms. The residues designed for the Aac2 CL-binding mutants are highlighted as indicated.



fig. S11

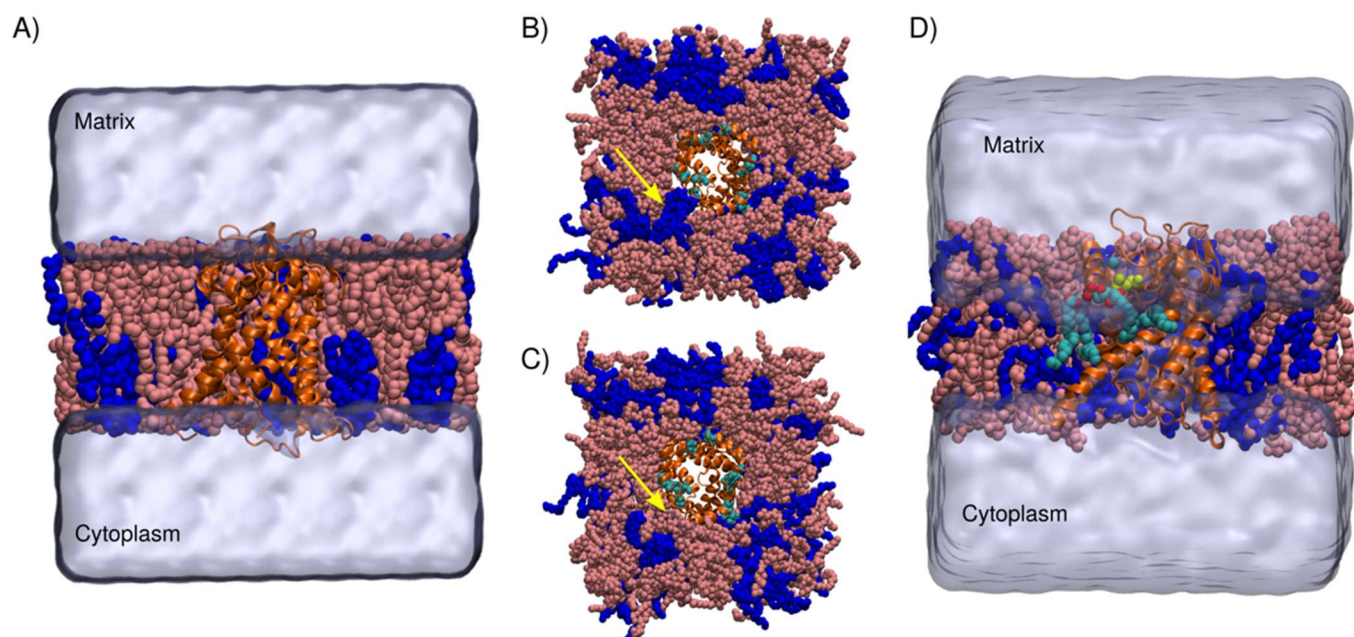

**fig. S11: Human ANT1 simulation system setup (c-state).** (A) The ANT1 protein (Orange cartoon), POPC (pink), and TLCL2 (tetralinoleoyl-cardiolipin (18:2)<sub>4</sub> in di-anionic form) (blue) were solvated in water (iso-blue surface). The top view (matrix view) of the ANT1 system setup for the equilibrium prebound (B) and equilibrium unbound (C) simulations. Yellow arrows point to the presence or absence of CL lipid, around pocket 2. (D) Human ANT1 free energy perturbation (FEP) calculation system setup showing the “ligand CL”, LIG (head group oxygen atoms in red, phosphorous atoms in green and acyl chain atoms in cyan van der Waals representation). The front portion of the membrane, hydrogen atoms, and the water molecules were removed for clarity.

fig. S12

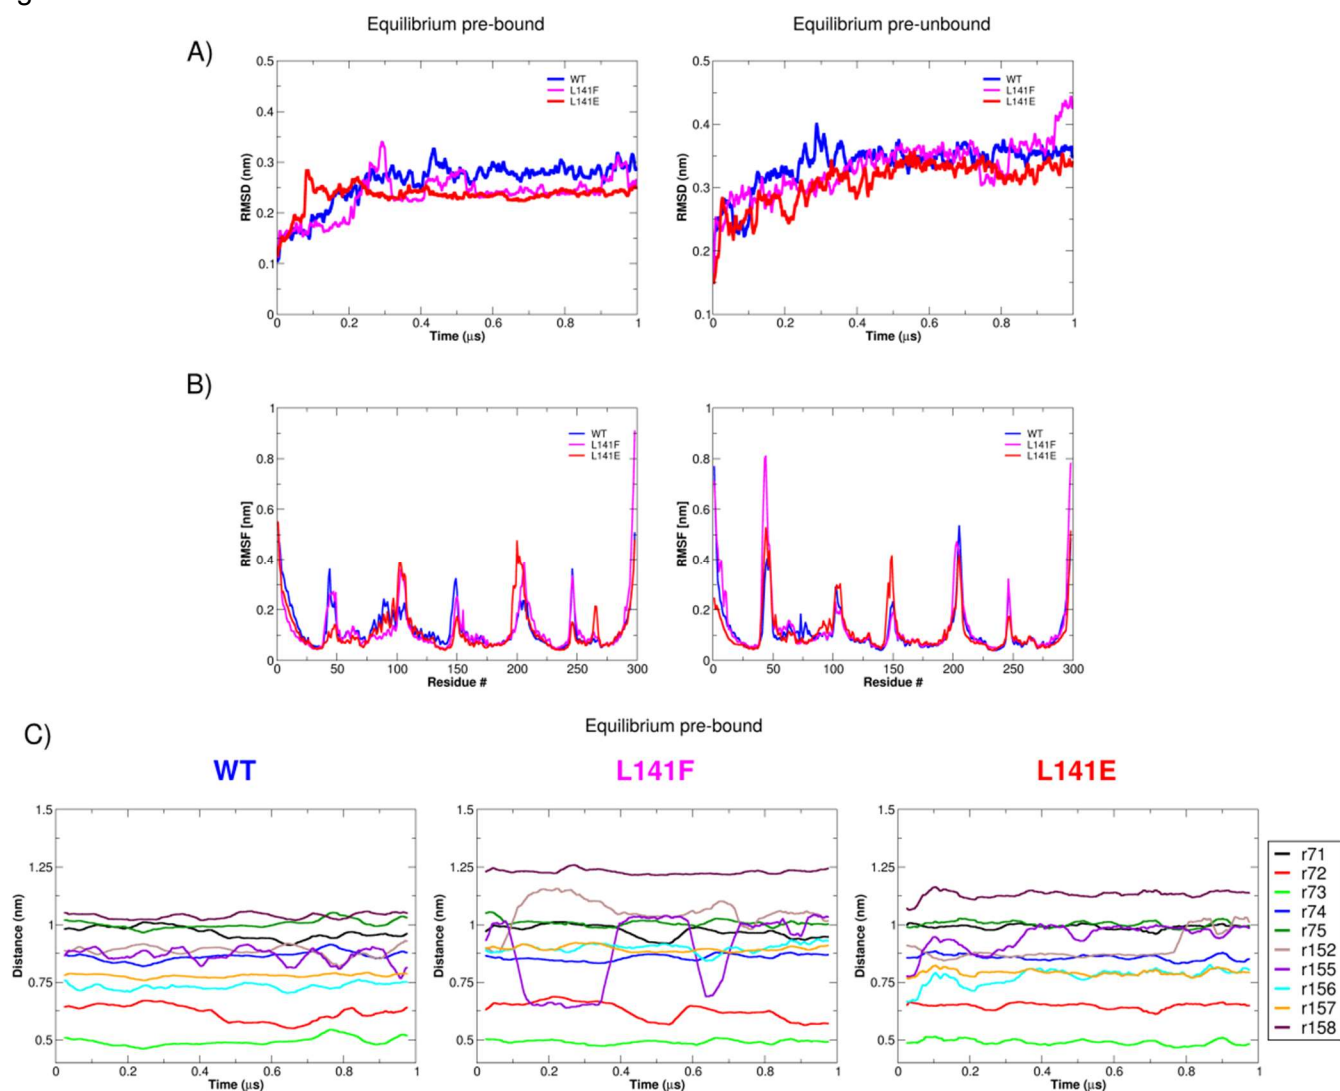

**fig. S12: ANT1 protein dynamics during MD simulations.** (A) Root-mean-squared deviation (RMSD) in prebound (left) and unbound (right) 1  $\mu$ s simulations; 100 frame running averaging was performed to smooth the curves. (B) Root-mean-squared fluctuations (RMSF) for prebound (left) and unbound (right) simulations. (C) Calculated distances between the C $\alpha$  atoms of residue 141 with that of the selected neighboring and pocket 2 binding site residues (residues 71, 72, 73, 74, 75, 152, 155, 156, 157, and 158) during prebound simulations.

fig. S13

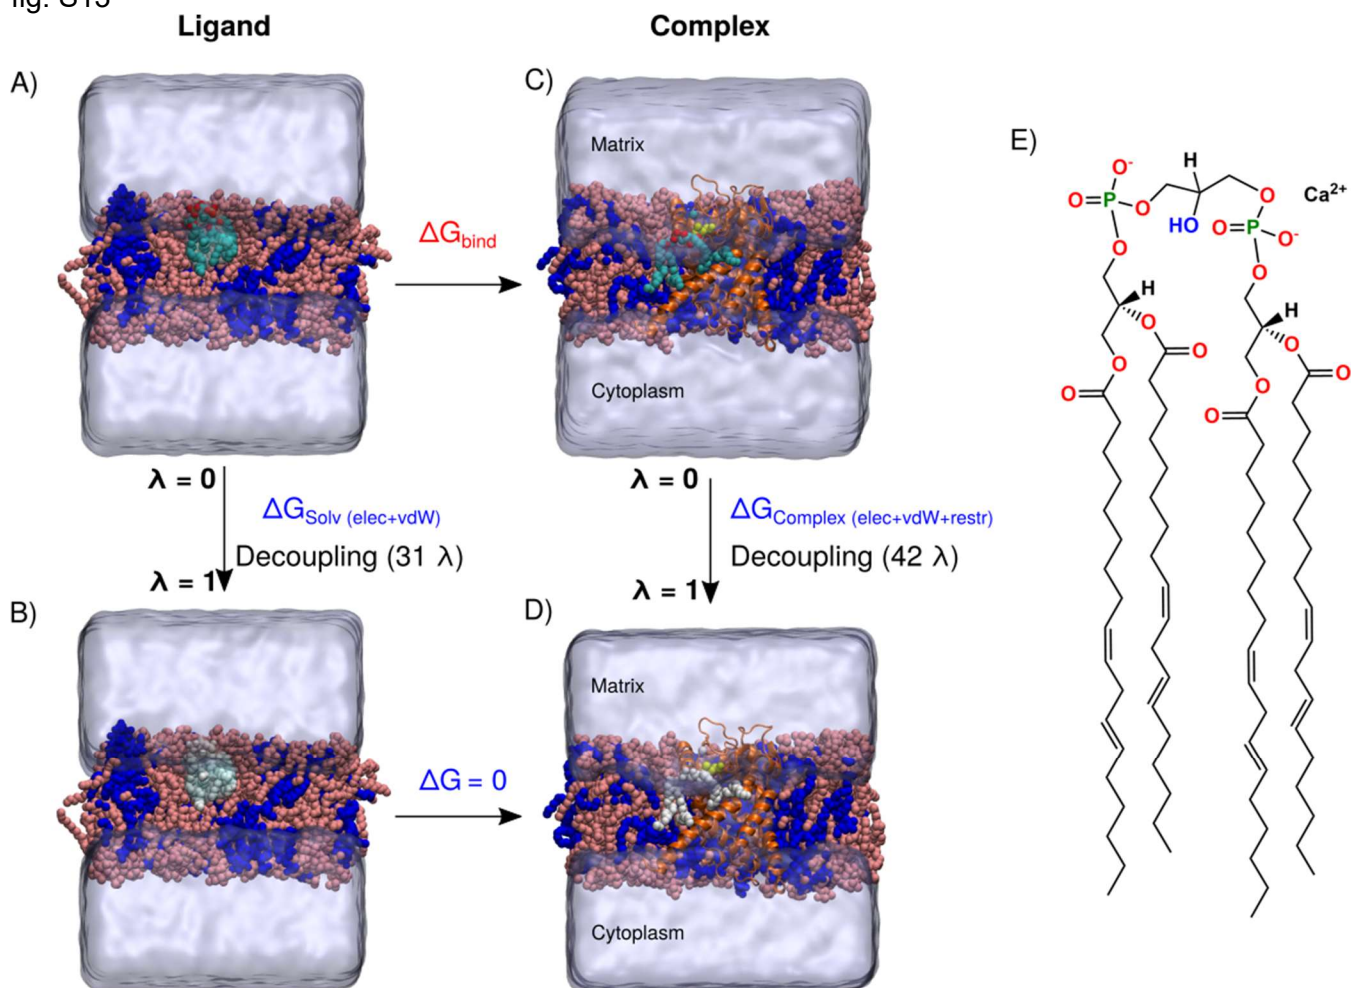

**fig. S13: FEP thermodynamic cycle.** (A) The fully integrated CL LIG in a bilayer environment is transformed into a completely non-interacting ligand (B, white) during a series of 31 equilibrium simulations in which corresponding electrostatic and van der Waals interactions are scaled to zero. The fully interacting LIG at the top right (C) is transformed into a completely non-interacting ligand (D, white) in the presence of ANT1 membrane protein during a series of 42 equilibrium simulations in which corresponding restraints, electrostatic, and van der Waals interactions are scaled to zero. The ANT1 protein (Orange cartoon), the POPC and TLCL2 membrane lipids (pink and blue van der Waals representation), and ligand LIG (head group oxygen atoms in red, phosphorous atoms in green and acyl chain atoms in cyan van der Waals representation) were solvated in water (iso-blue surface). (E) 2D structure of LIG used in the present study FEP calculations including the  $\text{Ca}^{+2}$  which was simultaneously decoupled with LIG to maintain charge neutrality.



**Table S1 Primers used to generate yeast mutant constructs.**

| Target             | Type    | Sequence (5'-3')                      |
|--------------------|---------|---------------------------------------|
| Aac2 5' UTR (Sall) | Forward | ACGCGTCGACGAGCACTGTTTCCAATGGAG        |
| Aac2 3' End (NotI) | Reverse | GTGGCGGCCGCTCTTATTTGAACTTCTTACCAAAC   |
| Aac2 I51E          | Forward | ACTTTTGGAAACAAAACCAAGATGAAATGTTAAAAC  |
| Aac2 I51E          | Reverse | ATCTTGTTTTTGTCCAAAAGTTTAACTCTTTCGATGG |
| Aac2 G69D          | Forward | AAAATACGCAGATATCTTAGACTGTTTCAAGAGAAC  |
| Aac2 G69D          | Reverse | CAGTCTAAGATATCTGCGTATTTTCTGTCCAAAG    |
| Aac2 N90E          | Forward | GGAGAGGTGAGACTGCTAACGTTATCCGTTATTTTC  |
| Aac2 N90E          | Reverse | GTTAGCAGTCTCACCTCTCCAGAATGAGATAAC     |
| Aac2 L155E         | Forward | CAAGAACTAGAGAAGCTGCTGACTCCAAGTC       |
| Aac2 L155E         | Reverse | AGCAGCTTCTCTAGTTCTTGCATAATCCAAAG      |
| Aac2 G172E         | Forward | GTCAATTCAACGAATTGATCGATGTCTACAAGAAG   |
| Aac2 G172E         | Reverse | CGATCAATTCGTTGAATTGACGAGCACC          |
| Aac2 R191D         | Forward | GGTCTTTACGACGGTTTCTTACCTTCTGTGCGTTG   |
| Aac2 R191D         | Reverse | AAGAAACCGTCGTAAAGACCAGCAACACCATC      |
| Aac2 L194E         | Forward | CAGAGGTTTCGAACCTTCTGTGCGTTGGTATTG     |
| Aac2 L194E         | Reverse | CAGAAGGTTTCGAACCTTCTGTAAAGACCAG       |
| Aac2 M255E         | Forward | AAGAAGAGAGATGATGACCTCCGGTCAAGC        |
| Aac2 M255E         | Reverse | GAGGTCATCATCTCTCTTCTTCTAACGGTATCCAATG |
| Aac2 G267E         | Forward | GTTAAGTACGACGAAGCCTTTGACTG            |
| Aac2 G267E         | Reverse | AAAGGCTTCGTCGTACTIONAACAGC            |
| Aac2 L155F         | Forward | AAGAACTAGATTCGCTGCTGACTCCAAGTCCTC     |
| Aac2 L155F         | Reverse | GAGTCAGCAGCGAATCTAGTTCTTGCATAATCC     |

|                  |         |                                                         |
|------------------|---------|---------------------------------------------------------|
| Aac2 N-term Flag | Forward | ATGGATTATAAAGATGATGACGATAAAATGTCTTCCAACGCCCAAGTC        |
| Aac2 N-term Flag | Reverse | TTTATCGTCATCATCTTTATAATCCATGGCTATTTGCTTATATGTATGTTAATGT |

**Table S2 Primers used to generate human mutant constructs.**

| Target                 | Type    | Sequence (5'-3')                                         |
|------------------------|---------|----------------------------------------------------------|
| ANT1 5' Flag (HindIII) | Forward | CCCAAGCTTATGGATTATAAAGATGATGACGATAAAATGGGTGATCACGCTTGGAG |
| ANT1 3' End (NotI)     | Reverse | ATTTGCGGCCGCTTAGACATATTTTTTGGATCTC                       |
| ANT1 L141E             | Forward | GCTAGGACCAGGGAGGCTGCTGATGTGGGCAAG                        |
| ANT1 L141E             | Reverse | ATCAGCAGCCTCCCTGGTCCTAGCAAAGTCCAGC                       |
| ANT1 L141F             | Forward | GCTAGGACCAGGTTGCTGCTGATGTGGGCAAG                         |
| ANT1 L141F             | Reverse | ATCAGCAGCGAACCTGGTCCTAGCAAAGTCCAGC                       |

**Table S3 Antibodies used in this study.**

| Antibodies                     | Source                                                         | Identifier      | Used in                                     |
|--------------------------------|----------------------------------------------------------------|-----------------|---------------------------------------------|
| Flag, mouse monoclonal (M2)    | Sigma-Aldrich                                                  | F3165           | fig. S1B                                    |
| Flag, mouse monoclonal (12C6c) | Developmental Studies Hybridoma Bank (DSHB)                    | RRID:AB_2890618 | Fig. 5C, E; Fig. 6B, C;                     |
| Flag, rabbit polyclonal        | Sigma-Aldrich                                                  | SAB4301135      | fig. S8A                                    |
| Aac2, mouse monoclonal (6H8)   | Panneels et al. 2003, Biochem Biophys Res Commun <sup>36</sup> | 6H8             | Fig. 1B, D; Fig. 3A, B; fig. S7A; fig. S10B |
| Tom70, rabbit polyclonal       | Riezman et al. 1983, EMBO J <sup>87</sup>                      | 7305            | Fig. 1B, D, Fig. 5C; fig. S6A               |
| Atp1/2, rabbit polyclonal      | Maccacchini et al. 1979, Proc Natl Acad Sci <sup>88</sup>      | UY3-T           | fig. S6A; fig. S8A                          |
| Por1, rabbit polyclonal        | Daum et al. 1982, J Biol Chem <sup>89</sup>                    | 425             | fig. S8A                                    |
| Kgd1, rabbit polyclonal        | Glick et al. 1992, Cell <sup>90</sup>                          | 453-3           | Fig. 1B, Fig. 5C; fig. S6A                  |
| Cor2, rabbit polyclonal        | Glick et al. 1992, Cell <sup>90</sup>                          | CC2-T           | fig. S6A; fig. S8A                          |
| Cox1, rabbit polyclonal        | Dowhan et al. 1985, EMBO J <sup>91</sup>                       | DD2-4           | fig. S6A; fig. S8A                          |
| Cox2, rabbit polyclonal        | Poyton et al. 1975, J Biol Chem <sup>92</sup>                  | 173             | fig. S6A; fig. S8A                          |



|                                                               |                                                                |                          |                                                                                          |
|---------------------------------------------------------------|----------------------------------------------------------------|--------------------------|------------------------------------------------------------------------------------------|
| Cox3, mouse monoclonal (DA5BC4)                               | Invitrogen                                                     | 459300                   | fig. S6A                                                                                 |
| Cox4, rabbit polyclonal                                       | Baile et al. 2013, Mol Biol Cell <sup>93</sup>                 | MGB65                    | fig. S6A; fig. S7A; fig. S8A                                                             |
| Rip1, rabbit polyclonal                                       | Baile et al. 2013, Mol Biol Cell <sup>93</sup>                 | MGB71                    | fig. S6A; fig. S7A; fig. S8A                                                             |
| Qcr6, rabbit polyclonal                                       | Baile et al. 2013, Mol Biol Cell <sup>93</sup>                 | MGB73                    | fig. S6A; fig. S8A                                                                       |
| Atp6, rabbit polyclonal                                       | Kabala et al. 2014, Biochimie <sup>94</sup>                    | N/A                      | fig. S6A                                                                                 |
| Taz, rabbit polyclonal                                        | Claypool et al. 2006, J Cell Biol <sup>59</sup>                | 4248                     | Fig. 1D                                                                                  |
| Abf2, rabbit polyclonal                                       | Calzada et al. 2019, Nat Commun <sup>55</sup>                  | 5477                     | Fig. 1D                                                                                  |
| Tim54, rabbit polyclonal                                      | This study                                                     | 7303                     | fig. S6A; fig. S10B                                                                      |
| $\beta$ -actin, mouse monoclonal                              | Sigma-Aldrich                                                  | A5441; RRID:AB_476744    | Fig. 6B, fig. S10C                                                                       |
| GRP75, mouse monoclonal                                       | Antibodies Incorporated                                        | 75-127; RRID: AB_2120479 | Fig. 6B                                                                                  |
| ANT1, mouse monoclonal (1F3F11)                               | Lu et al. 2017, Mol Cell Biol <sup>58</sup>                    | N/A                      | fig. S10C                                                                                |
| ANT2, rabbit polyclonal                                       | Acoba et al. 2021, Cell Rep <sup>56</sup>                      | 5695                     | fig. S10B, C                                                                             |
| ANT2/3, mouse monoclonal (5H7)                                | Panneels et al. 2003, Biochem Biophys Res Commun <sup>36</sup> | N/A                      | fig. S10C                                                                                |
| HRP-conjugated secondary, goat anti-rabbit IgG (H+L)          | Thermo Fisher Scientific                                       | 31460; RRID:AB_228341    | Fig. 1B, D; Fig. 3A, B; Fig. 5C, E; Fig. 6 B, C; fig. S1B; fig. S7A; fig. S8A; fig. S10B |
| HRP-conjugated secondary, goat anti-mouse IgG (H+L)           | Thermo Fisher Scientific                                       | 62-6520; RRID:AB_2533947 | Fig. 1B, D; Fig. 3A, B; Fig. 5C, E; Fig. 6 B, C; fig. S1B; fig. S7A; fig. S8A; fig. S10B |
| Daylight 650 conjugated secondary, goat anti-rabbit IgG (H+L) | Invitrogen                                                     | 84546                    | fig. S6                                                                                  |
| Daylight 550 conjugated secondary, goat anti-mouse IgG (H+L)  | Invitrogen                                                     | 84540                    | fig. S6                                                                                  |

**Table S4 Overview of the simulation setup and details.**

| Simulation Methods                  | System              | Simulation length                |
|-------------------------------------|---------------------|----------------------------------|
| Equilibrium<br>Pocket 2 CL prebound | WT                  | 1 X 1 $\mu$ s                    |
|                                     | L141F               | 1 X 1 $\mu$ s                    |
|                                     | L141E               | 1 X 1 $\mu$ s                    |
| Equilibrium<br>Pocket 2 CL unbound  | WT                  | 1 X 1 $\mu$ s                    |
|                                     | L141F               | 1 X 1 $\mu$ s                    |
|                                     | L141E               | 1 X 1 $\mu$ s                    |
| Free Energy Perturbations<br>(FEP)  | WT (42 X 15 ns)     | 4 X 0.63 $\mu$ s = 2.52 $\mu$ s  |
|                                     | L141F (42 X 15 ns)  | 4 X 0.63 $\mu$ s = 2.52 $\mu$ s  |
|                                     | L141E (42 X 15 ns)  | 4 X 0.63 $\mu$ s = 2.52 $\mu$ s  |
|                                     | Ligand (31 X 15 ns) | 4 X 0.465 $\mu$ s = 1.86 $\mu$ s |
|                                     |                     | Total = 15.42 $\mu$ s            |
